# Supplementary material
Source: PubMed Central journal article supplement (PMC8775356)
Supplement: NIHMS1742982-supplement-1.pdf [file NIHMS1742982-supplement-1.pdf]

Supplemental Material

| <b>Supplemental Table 1. Demographic and clinical characteristics of the study population by age and sex groups on April 1, 2015 (N=197,578)<sup>a</sup></b> |                         |               |                         |               |                       |               |                    |
|--------------------------------------------------------------------------------------------------------------------------------------------------------------|-------------------------|---------------|-------------------------|---------------|-----------------------|---------------|--------------------|
| <b>Characteristic</b>                                                                                                                                        | <b>Ages 20-49 N (%)</b> |               | <b>Ages 50-69 N (%)</b> |               | <b>Ages ≥70 N (%)</b> |               | <b>Total N (%)</b> |
|                                                                                                                                                              | <b>Men</b>              | <b>Women</b>  | <b>Men</b>              | <b>Women</b>  | <b>Men</b>            | <b>Women</b>  |                    |
| <b>Demographics</b>                                                                                                                                          |                         |               |                         |               |                       |               |                    |
| Race                                                                                                                                                         |                         |               |                         |               |                       |               |                    |
| White                                                                                                                                                        | 38,041 (81.3)           | 44,059 (83.2) | 29,210 (91.8)           | 31,672 (92.2) | 13,128 (95.7)         | 17,152 (95.8) | 173,262 (87.7)     |
| Black                                                                                                                                                        | 2,656 (5.7)             | 2,620 (5.0)   | 614 (1.9)               | 591 (1.7)     | 113 (0.8)             | 146 (0.8)     | 6,740 (3.4)        |
| Asian                                                                                                                                                        | 1,824 (3.9)             | 2,446 (4.6)   | 621 (2.0)               | 811 (2.4)     | 1698(1.2)             | 247 (1.4)     | 6,117 (3.1)        |
| Other                                                                                                                                                        | 2,293 (4.9)             | 2,632 (5.0)   | 810 (2.5)               | 835 (2.4)     | 224 (1.6)             | 250 (1.4)     | 7,044 (3.6)        |
| Unknown                                                                                                                                                      | 2,007 (4.3)             | 1,199 (2.3)   | 578 (1.8)               | 429 (1.3)     | 86 (0.6)              | 116 (0.7)     | 4,415 (2.2)        |
| Ethnicity                                                                                                                                                    |                         |               |                         |               |                       |               |                    |
| Hispanic                                                                                                                                                     | 3,637 (7.8)             | 3,742 (7.1)   | 1,329 (4.2)             | 1,208 (3.5)   | 304 (2.2)             | 326 (1.8)     | 10,546 (5.3)       |
| Non-Hispanic                                                                                                                                                 | 43,184 (92.2)           | 49,214 (92.9) | 30,504 (95.8)           | 33,130 (96.5) | 13,415 (97.8)         | 17,585 (98.2) | 187,032 (94.7)     |
| <b>Chronic Conditions</b>                                                                                                                                    |                         |               |                         |               |                       |               |                    |
| Hypertension                                                                                                                                                 | 3,626 (7.7)             | 2,982 (5.6)   | 12,368 (38.9)           | 11,573 (33.7) | 9,840 (71.7)          | 13,034 (72.8) | 53,423 (27.0)      |
| Hyperlipidemia                                                                                                                                               | 4,394 (9.4)             | 3,261 (6.2)   | 14,905 (46.8)           | 13,856 (40.4) | 9,868 (71.9)          | 12,220 (68.2) | 58,504 (29.6)      |
| Diabetes                                                                                                                                                     | 2,546 (5.4)             | 3,056 (5.8)   | 8,644 (27.2)            | 7,576 (22.1)  | 6,244 (45.5)          | 6,685 (37.3)  | 34,751 (17.6)      |
| Cardiac arrhythmias                                                                                                                                          | 1,515 (3.2)             | 2,466 (4.7)   | 3,732 (11.7)            | 3,219 (9.4)   | 5,658 (41.2)          | 5,710 (31.9)  | 22,300 (11.3)      |
| Coronary artery disease                                                                                                                                      | 306 (0.7)               | 139 (0.3)     | 3,276 (10.3)            | 1,307 (3.8)   | 4,886 (35.6)          | 3,288 (18.4)  | 13,202 (6.7)       |
| Congestive heart failure                                                                                                                                     | 123 (0.3)               | 83 (0.2)      | 713 (2.2)               | 449 (1.3)     | 1,756 (12.8)          | 1,951 (10.9)  | 5,075 (2.6)        |
| Stroke                                                                                                                                                       | 100 (0.2)               | 137 (0.3)     | 683 (2.2)               | 565 (1.7)     | 1,528 (11.1)          | 1,627 (9.1)   | 4,640 (2.4)        |
| Arthritis                                                                                                                                                    | 1,557 (3.3)             | 2,121 (4.0)   | 6,026 (18.9)            | 8,568 (25.0)  | 5,191 (37.8)          | 8,475 (47.3)  | 31,938 (16.2)      |
| Osteoporosis                                                                                                                                                 | 76 (0.2)                | 116 (0.2)     | 232 (0.7)               | 1,563 (4.6)   | 484 (3.5)             | 4,011 (22.4)  | 6,482 (3.3)        |
| Cancer                                                                                                                                                       | 663 (1.4)               | 1,600 (3.0)   | 3,617 (11.4)            | 4,602 (13.4)  | 5,386 (39.3)          | 5,180 (28.9)  | 21,048 (10.7)      |
| Chronic kidney disease                                                                                                                                       | 490 (1.1)               | 549 (1.0)     | 1,601 (5.0)             | 1,299 (3.8)   | 2,751 (20.1)          | 2,724 (15.2)  | 9,414 (4.8)        |
| Hepatitis                                                                                                                                                    | 216 (0.5)               | 229 (0.4)     | 395 (1.2)               | 249 (0.7)     | 55 (0.4)              | 80 (0.5)      | 1,224 (0.6)        |
| Asthma                                                                                                                                                       | 1,907 (4.1)             | 3,889 (7.3)   | 1,382 (4.3)             | 2,796 (8.1)   | 844 (6.2)             | 1,401 (7.8)   | 12,219 (6.2)       |
| Chronic obstructive pulmonary disease                                                                                                                        | 480 (1.0)               | 942 (1.8)     | 1,617 (5.1)             | 1,920 (5.6)   | 1,979 (14.4)          | 2,074 (11.6)  | 9,012 (4.6)        |
| Dementia                                                                                                                                                     | 219 (0.5)               | 206 (0.4)     | 357 (1.1)               | 387 (1.1)     | 1,109 (8.1)           | 1,721 (9.6)   | 3,995 (2.0)        |
| Anxiety                                                                                                                                                      | 4,510 (9.6)             | 9,256 (17.5)  | 2,270 (7.1)             | 4,479 (13.0)  | 874 (6.4)             | 2,359 (13.2)  | 23,748 (12.0)      |
| Depression                                                                                                                                                   | 5,693 (12.2)            | 12,432 (23.5) | 3,777 (11.9)            | 7,791 (22.7)  | 1,640 (12.0)          | 3,546 (19.8)  | 34,879 (17.7)      |
| Schizophrenia                                                                                                                                                | 525 (1.1)               | 264 (0.5)     | 306 (1.0)               | 320 (0.9)     | 209 (1.5)             | 410 (2.3)     | 2,034 (1.0)        |
| Substance abuse disorders                                                                                                                                    | 3,316 (7.1)             | 2,478 (4.7)   | 1,731 (5.4)             | 1,078 (3.1)   | 349 (2.5)             | 182 (1.0)     | 9,134 (4.6)        |

<sup>a</sup>Total population with age ≥20 years who provided research authorization and resided in a 7-county region of Southern Minnesota on April 1, 2015.

**Supplemental Table 2. Odds ratio (95% confidence interval)<sup>a</sup> of each chronic condition across national quintiles of area deprivation index by age group<sup>b</sup>**

| Chronic condition                        | Quintile 2<br>(21-40%) | Quintile 3<br>(41-60%) | Quintile 4<br>(61-80%) | Quintile 5<br>(81-100%) | P-trend <sup>c</sup> |
|------------------------------------------|------------------------|------------------------|------------------------|-------------------------|----------------------|
| <b>Ages 20-49 (N=99,777)</b>             |                        |                        |                        |                         |                      |
| <b>Cardiometabolic conditions</b>        |                        |                        |                        |                         |                      |
| Hypertension                             | 1.47 (1.12,1.95)       | 2.07 (1.58,2.72)       | 2.36 (1.79,3.11)       | 3.14 (2.32,4.26)        | <0.001               |
| Hyperlipidemia                           | 1.23 (0.96,1.57)       | 1.53 (1.20,1.94)       | 1.69 (1.33,2.15)       | 2.43 (1.86,3.19)        | <0.001               |
| Diabetes                                 | 1.14 (0.95,1.37)       | 1.50 (1.25,1.80)       | 1.74 (1.45,2.09)       | 2.19 (1.78,2.69)        | <0.001               |
| Cardiac arrhythmias                      | 1.16 (0.95,1.41)       | 1.30 (1.07,1.58)       | 1.51 (1.24,1.84)       | 1.99 (1.59,2.50)        | <0.001               |
| Coronary artery disease                  | 1.12 (0.62,2.01)       | 1.63 (0.92,2.90)       | 2.09 (1.17,3.73)       | 3.24 (1.70,6.14)        | <0.001               |
| Congestive heart failure                 | 4.04 (0.94,17.36)      | 5.51 (1.30,23.47)      | 8.00 (1.88,34.04)      | 12.81<br>(2.89,56.85)   | <0.001               |
| Stroke                                   | 1.02 (0.51,2.03)       | 1.30 (0.66,2.57)       | 1.55 (0.78,3.08)       | 1.99 (0.90,4.42)        | 0.0068               |
| <b>Other somatic conditions</b>          |                        |                        |                        |                         |                      |
| Arthritis                                | 1.27 (1.02,1.57)       | 1.58 (1.28,1.95)       | 1.68 (1.35,2.08)       | 2.07 (1.61,2.66)        | <0.001               |
| Osteoporosis                             | 0.84 (0.43,1.63)       | 0.91 (0.47,1.76)       | 1.15 (0.59,2.24)       | 2.51 (1.19,5.27)        | 0.0024               |
| Cancer                                   | 0.98 (0.79,1.23)       | 1.02 (0.82,1.28)       | 0.99 (0.79,1.25)       | 1.10 (0.83,1.47)        | 0.5763               |
| Chronic kidney disease                   | 1.46 (0.96,2.22)       | 2.20 (1.46,3.32)       | 2.14 (1.41,3.24)       | 3.81 (2.42,6.00)        | <0.001               |
| Hepatitis                                | 0.77 (0.49,1.21)       | 0.89 (0.56,1.39)       | 1.33 (0.85,2.06)       | 1.82 (1.09,3.04)        | <0.001               |
| Asthma                                   | 1.09 (0.91,1.30)       | 1.17 (0.98,1.38)       | 1.37 (1.16,1.63)       | 1.60 (1.31,1.95)        | <0.001               |
| Chronic obstructive<br>pulmonary disease | 2.50 (1.39,4.51)       | 3.26 (1.83,5.83)       | 4.34 (2.43,7.78)       | 7.72 (4.18,14.26)       | <0.001               |
| <b>Mental health conditions</b>          |                        |                        |                        |                         |                      |
| Dementia                                 | 0.60 (0.40,0.89)       | 0.72 (0.49,1.06)       | 0.84 (0.56,1.25)       | 1.11 (0.68,1.81)        | 0.0293               |
| Anxiety                                  | 1.14 (0.97,1.34)       | 1.35 (1.16,1.58)       | 1.63 (1.39,1.91)       | 2.23 (1.87,2.66)        | <0.001               |
| Depression                               | 1.28 (1.08,1.50)       | 1.57 (1.34,1.85)       | 1.91 (1.62,2.24)       | 2.49 (2.08,2.99)        | <0.001               |
| Schizophrenia                            | 1.09 (0.69,1.61)       | 1.24 (0.82,1.87)       | 1.91 (1.31,2.77)       | 2.55 (1.76,3.70)        | <0.001               |
| Substance abuse disorders                | 1.16 (0.87,1.54)       | 1.41 (1.07,1.87)       | 2.04 (1.55,2.71)       | 3.40 (2.51,4.61)        | <0.001               |
| <b>Ages 50-69 (N=66,171)</b>             |                        |                        |                        |                         |                      |
| <b>Cardiometabolic conditions</b>        |                        |                        |                        |                         |                      |
| Hypertension                             | 1.34 (1.15,1.57)       | 1.65 (1.41,1.92)       | 1.84 (1.57,2.15)       | 2.54 (2.13,3.03)        | <0.001               |
| Hyperlipidemia                           | 1.12 (0.96,1.30)       | 1.36 (1.17,1.57)       | 1.39 (1.20,1.62)       | 1.77 (1.49,2.11)        | <0.001               |
| Diabetes                                 | 1.14 (1.01,1.29)       | 1.31 (1.16,1.47)       | 1.49 (1.32,1.68)       | 1.88 (1.63,2.17)        | <0.001               |
| Cardiac arrhythmias                      | 1.06 (0.91,1.24)       | 1.19 (1.02,1.39)       | 1.36 (1.17,1.59)       | 1.72 (1.43,2.07)        | <0.001               |
| Coronary artery disease                  | 1.23 (0.99,1.52)       | 1.55 (1.25,1.92)       | 1.78 (1.43,2.22)       | 2.43 (1.89,3.11)        | <0.001               |
| Congestive heart failure                 | 1.28 (0.87,1.89)       | 1.88 (1.28,2.74)       | 2.41 (1.64,3.53)       | 3.82 (2.51,5.82)        | <0.001               |
| Stroke                                   | 1.11 (0.82,1.52)       | 1.38 (1.02,1.88)       | 1.74 (1.27,2.37)       | 2.48 (1.74,3.52)        | <0.001               |
| <b>Other somatic conditions</b>          |                        |                        |                        |                         |                      |
| Arthritis                                | 0.97 (0.86,1.10)       | 1.05 (0.94,1.18)       | 1.14 (1.01,1.28)       | 1.23 (1.07,1.42)        | 0.0021               |
| Osteoporosis                             | 0.91 (0.73,1.14)       | 0.97 (0.78,1.22)       | 1.05 (0.83,1.32)       | 1.19 (0.89,1.59)        | 0.0417               |
| Cancer                                   | 0.94 (0.82,1.08)       | 0.93 (0.81,1.06)       | 0.94 (0.82,1.08)       | 0.97 (0.82,1.08)        | 0.8890               |
| Chronic kidney disease                   | 1.33 (1.06,1.65)       | 1.68 (1.36,2.09)       | 2.11 (1.69,2.62)       | 3.05 (2.39,3.91)        | <0.001               |
| Hepatitis                                | 0.93 (0.56,1.53)       | 1.38 (0.84,2.26)       | 1.94 (1.18,3.18)       | 3.82 (2.24,6.51)        | <0.001               |
| Asthma                                   | 0.87 (0.74,1.03)       | 1.10 (0.94,1.30)       | 1.28 (1.08,1.51)       | 1.97 (1.63,2.40)        | <0.001               |
| Chronic obstructive<br>pulmonary disease | 1.41 (1.05,1.91)       | 2.04 (1.52,2.73)       | 3.13 (2.32,4.21)       | 5.58 (4.05,7.68)        | <0.001               |
| <b>Mental health conditions</b>          |                        |                        |                        |                         |                      |
| Dementia                                 | 1.05 (0.73,1.50)       | 1.21 (0.85,1.73)       | 1.51 (1.05,2.17)       | 1.86 (1.21,2.86)        | <0.001               |
| Anxiety                                  | 1.14 (0.95,1.36)       | 1.36 (1.14,1.63)       | 1.79 (1.50,2.15)       | 2.86 (2.33,3.50)        | <0.001               |
| Depression                               | 1.23 (1.05,1.43)       | 1.57 (1.35,1.82)       | 2.02 (1.73,2.36)       | 3.00 (2.52,3.57)        | <0.001               |
| Schizophrenia                            | 0.59 (0.32,1.09)       | 0.92 (0.51,1.68)       | 1.89 (1.04,3.42)       | 3.38 (1.77,6.45)        | <0.001               |
| Substance abuse disorders                | 1.27 (0.91,1.79)       | 1.73 (1.24,2.41)       | 2.79 (2.00,3.90)       | 4.62 (3.21,6.65)        | <0.001               |
| <b>Ages ≥70 (N=31,630)</b>               |                        |                        |                        |                         |                      |
| <b>Cardiometabolic conditions</b>        |                        |                        |                        |                         |                      |
| Hypertension                             | 1.29 (1.08,1.54)       | 1.38 (1.16,1.64)       | 1.68 (1.40,2.01)       | 2.17 (1.75,2.68)        | <0.001               |

**Supplemental Table 2. Odds ratio (95% confidence interval)<sup>a</sup> of each chronic condition across national quintiles of area deprivation index by age group<sup>b</sup>**

| Chronic condition                     | Quintile 2<br>(21-40%) | Quintile 3<br>(41-60%) | Quintile 4<br>(61-80%) | Quintile 5<br>(81-100%) | P-trend <sup>c</sup> |
|---------------------------------------|------------------------|------------------------|------------------------|-------------------------|----------------------|
| Hyperlipidemia                        | 1.13 (0.91,1.39)       | 1.20 (0.98,1.48)       | 1.27 (1.03,1.56)       | 1.58 (1.24,2.01)        | <0.001               |
| Diabetes                              | 1.05 (0.87,1.27)       | 0.98 (0.81,1.18)       | 1.00 (0.83,1.21)       | 1.19 (0.96,1.48)        | 0.4389               |
| Cardiac arrhythmias                   | 0.98 (0.83,1.17)       | 1.01 (0.85,1.20)       | 1.14 (0.96,1.35)       | 1.20 (0.99,1.47)        | 0.0004               |
| Coronary artery disease               | 1.04 (0.89,1.23)       | 1.14 (0.97,1.33)       | 1.26 (1.07,1.49)       | 1.43 (1.18,1.73)        | <0.001               |
| Congestive heart failure              | 1.31 (0.99,1.73)       | 1.36 (1.04,1.78)       | 1.66 (1.26,2.18)       | 1.89 (1.39,2.56)        | <0.001               |
| Stroke                                | 1.19 (0.95,1.48)       | 1.21 (0.98,1.50)       | 1.33 (1.07,1.65)       | 1.41 (1.09,1.81)        | 0.0021               |
| <b>Other somatic conditions</b>       |                        |                        |                        |                         |                      |
| Arthritis                             | 0.82 (0.69,0.98)       | 0.80 (0.67,0.93)       | 0.78 (0.65,0.92)       | 0.72 (0.59,0.88)        | 0.0054               |
| Osteoporosis                          | 0.84 (0.66,1.07)       | 0.81 (0.64,1.03)       | 0.96 (0.76,1.23)       | 1.01 (0.76,1.34)        | 0.0870               |
| Cancer                                | 0.87 (0.74,1.03)       | 0.89 (0.76,1.05)       | 0.89 (0.75,1.05)       | 0.92 (0.75,1.12)        | 0.9454               |
| Chronic kidney disease                | 1.22 (0.97,1.52)       | 1.37 (1.10,1.71)       | 1.57 (1.25,1.96)       | 2.08 (1.62,2.68)        | <0.001               |
| Hepatitis                             | 1.16 (0.49,2.76)       | 1.30 (0.56,3.04)       | 1.14 (0.48,2.71)       | 0.96 (0.32,2.85)        | 0.9454               |
| Asthma                                | 0.93 (0.72,1.19)       | 1.01 (0.79,1.29)       | 1.20 (0.94,1.54)       | 1.80 (1.36,2.38)        | <0.001               |
| Chronic obstructive pulmonary disease | 1.15 (0.91,1.45)       | 1.34 (1.06,1.68)       | 1.76 (1.40,2.22)       | 2.61 (2.02,3.36)        | <0.001               |
| <b>Mental health conditions</b>       |                        |                        |                        |                         |                      |
| Dementia                              | 1.04 (0.73,1.46)       | 1.03 (0.73,1.44)       | 1.32 (0.94,1.86)       | 1.27 (0.86,1.86)        | 0.0065               |
| Anxiety                               | 1.10 (0.84,1.44)       | 1.27 (0.97,1.65)       | 1.58 (1.21,2.06)       | 2.08 (1.55,2.79)        | <0.001               |
| Depression                            | 1.10 (0.87,1.39)       | 1.21 (0.96,1.52)       | 1.47 (1.17,1.85)       | 1.83 (1.41,2.38)        | <0.001               |
| Schizophrenia                         | 1.59 (0.84,2.98)       | 1.35 (0.73,2.52)       | 1.86 (1.00,3.48)       | 2.76 (1.40,5.43)        | 0.0019               |
| Substance abuse disorders             | 0.78 (0.46,1.31)       | 0.98 (0.59,1.62)       | 1.21 (0.73,2.02)       | 1.42 (0.80,2.56)        | 0.0022               |

<sup>a</sup>Adjusted for sex, race, ethnicity, and individual level of education.

<sup>b</sup>The area deprivation index was estimated at the census block group level. Quintiles were defined using national area deprivation index rankings from the Neighborhood Atlas (<https://www.neighborhoodatlas.medicine.wisc.edu/>). Quintile 1 (1-20%) served as the reference (OR=1.00).

<sup>c</sup>Differences across quintiles were tested using a test for linear trend of the ORs. The P-value for trend was adjusted for the false discovery rate.

The two-way interactions of area deprivation index by age reached statistical significance for the following chronic conditions: hypertension, hyperlipidemia, diabetes, cardiac arrhythmias, coronary artery disease, congestive heart failure, stroke, arthritis, chronic kidney disease, hepatitis, asthma, chronic obstructive pulmonary disease, anxiety, depression, schizophrenia, and substance abuse disorders.

**Supplemental Table 3. Odds ratio (95% confidence interval)<sup>a</sup> of each chronic condition across national quintiles of area deprivation index by sex<sup>b</sup>**

| Chronic condition                     | Quintile 2<br>(21-40%) | Quintile 3<br>(41-60%) | Quintile 4<br>(61-80%) | Quintile 5<br>(81-100%) | P-trend <sup>c</sup> |
|---------------------------------------|------------------------|------------------------|------------------------|-------------------------|----------------------|
| <b>Women (N=105,205)</b>              |                        |                        |                        |                         |                      |
| <b>Cardiometabolic conditions</b>     |                        |                        |                        |                         |                      |
| Hypertension                          | 1.37 (1.16,1.62)       | 1.67 (1.42,1.97)       | 1.96 (1.66,2.31)       | 2.62 (2.18,3.16)        | <0.001               |
| Hyperlipidemia                        | 1.19 (1.00,1.42)       | 1.46 (1.23,1.73)       | 1.62 (1.36,1.93)       | 2.18 (1.79,2.66)        | <0.001               |
| Diabetes                              | 1.18 (1.04,1.35)       | 1.31 (1.16,1.49)       | 1.51 (1.33,1.71)       | 1.88 (1.62,2.17)        | <0.001               |
| Cardiac arrhythmias                   | 1.06 (0.93,1.21)       | 1.16 (1.02,1.33)       | 1.39 (1.21,1.59)       | 1.52 (1.30,1.78)        | <0.001               |
| Coronary artery disease               | 1.38 (1.11,1.73)       | 1.51 (1.22,1.88)       | 1.89 (1.52,2.36)       | 2.34 (1.83,3.00)        | <0.001               |
| Congestive heart failure              | 1.57 (1.12,2.19)       | 1.77 (1.28,2.46)       | 2.26 (1.63,3.14)       | 2.71 (1.89,3.89)        | <0.001               |
| Stroke                                | 1.25 (0.98,1.60)       | 1.42 (1.12,1.80)       | 1.58 (1.24,2.01)       | 1.79 (1.36,2.36)        | <0.001               |
| <b>Other somatic conditions</b>       |                        |                        |                        |                         |                      |
| Arthritis                             | 0.99 (0.89,1.11)       | 1.11 (0.99,1.25)       | 1.19 (1.06,1.34)       | 1.26 (1.10,1.45)        | <0.001               |
| Osteoporosis                          | 0.86 (0.70,1.06)       | 0.89 (0.72,1.09)       | 0.99 (0.80,1.22)       | 1.13 (0.89,1.44)        | 0.0075               |
| Cancer                                | 0.93 (0.81,1.05)       | 0.94 (0.82,1.06)       | 0.93 (0.82,1.06)       | 0.97 (0.83,1.13)        | 0.9720               |
| Chronic kidney disease                | 1.32 (1.05,1.67)       | 1.59 (1.26,1.99)       | 1.92 (1.53,2.42)       | 2.79 (2.16,3.59)        | <0.001               |
| Hepatitis                             | 0.81 (0.51,1.27)       | 1.13 (0.72,1.76)       | 1.26 (0.81,1.97)       | 2.14 (1.30,3.52)        | <0.001               |
| Asthma                                | 0.99 (0.86,1.15)       | 1.18 (1.02,1.36)       | 1.40 (1.21,1.62)       | 1.87 (1.59,2.20)        | <0.001               |
| Chronic obstructive pulmonary disease | 1.58 (1.18,2.11)       | 2.07 (1.56,2.76)       | 2.93 (2.20,3.90)       | 5.17 (3.80,7.04)        | <0.001               |
| <b>Mental health conditions</b>       |                        |                        |                        |                         |                      |
| Dementia                              | 1.02 (0.74,1.41)       | 1.01 (0.73,1.38)       | 1.26 (0.92,1.74)       | 1.34 (0.93,1.93)        | 0.0023               |
| Anxiety                               | 1.20 (1.04,1.39)       | 1.41 (1.23,1.62)       | 1.75 (1.52,2.02)       | 2.48 (2.12,2.90)        | <0.001               |
| Depression                            | 1.32 (1.15,1.51)       | 1.61 (1.41,1.83)       | 1.98 (1.73,2.26)       | 2.58 (2.23,3.00)        | <0.001               |
| Schizophrenia                         | 0.98 (0.60,1.59)       | 1.19 (0.74,1.91)       | 2.06 (1.28,3.29)       | 2.83 (1.70,4.73)        | <0.001               |
| Substance abuse disorders             | 1.21 (0.89,1.63)       | 1.53 (1.14,2.05)       | 2.29 (1.71,3.07)       | 3.53 (2.57,4.85)        | <0.001               |
| <b>Men (N=92,373)</b>                 |                        |                        |                        |                         |                      |
| <b>Cardiometabolic conditions</b>     |                        |                        |                        |                         |                      |
| Hypertension                          | 1.32 (1.12,1.57)       | 1.64 (1.39,1.94)       | 1.81 (1.53,2.14)       | 2.48 (2.05,3.01)        | <0.001               |
| Hyperlipidemia                        | 1.11 (0.93,1.31)       | 1.28 (1.09,1.51)       | 1.26 (1.06,1.49)       | 1.61 (1.33,1.95)        | <0.001               |
| Diabetes                              | 1.06 (0.94,1.20)       | 1.17 (1.05,1.32)       | 1.24 (1.10,1.40)       | 1.55 (1.35,1.78)        | <0.001               |
| Cardiac arrhythmias                   | 1.03 (0.88,1.20)       | 1.11 (0.96,1.29)       | 1.20 (1.03,1.40)       | 1.58 (1.32,1.89)        | <0.001               |
| Coronary artery disease               | 1.02 (0.88,1.19)       | 1.26 (1.09,1.46)       | 1.33 (1.14,1.55)       | 1.66 (1.39,1.98)        | <0.001               |
| Congestive heart failure              | 1.21 (0.94,1.55)       | 1.21 (1.10,1.79)       | 1.70 (1.33,2.18)       | 2.35 (1.78,3.11)        | <0.001               |
| Stroke                                | 1.09 (0.86,1.38)       | 1.16 (0.92,1.47)       | 1.39 (1.10,1.77)       | 1.69 (1.28,2.24)        | <0.001               |
| <b>Other somatic conditions</b>       |                        |                        |                        |                         |                      |
| Arthritis                             | 0.94 (0.83,1.06)       | 0.95 (0.84,1.07)       | 0.95 (0.84,1.08)       | 0.98 (0.84,1.14)        | 0.6671               |
| Osteoporosis                          | 0.95 (0.66,1.37)       | 0.77 (0.53,1.11)       | 1.19 (0.83,1.73)       | 1.22 (0.78,1.92)        | 0.0419               |
| Cancer                                | 0.92 (0.80,1.07)       | 0.93 (0.81,1.08)       | 0.94 (0.81,1.09)       | 0.98 (0.82,1.17)        | 0.7830               |
| Chronic kidney disease                | 1.27 (1.03,1.56)       | 1.56 (1.28,1.91)       | 1.73 (1.41,2.12)       | 2.39 (1.89,3.01)        | <0.001               |
| Hepatitis                             | 0.96 (0.61,1.52)       | 1.22 (0.78,1.92)       | 1.95 (1.25,3.07)       | 3.13 (1.90,5.14)        | <0.001               |
| Asthma                                | 0.92 (0.79,1.07)       | 0.99 (0.85,1.16)       | 1.13 (0.96,1.32)       | 1.55 (1.29,1.86)        | <0.001               |
| Chronic obstructive pulmonary disease | 1.18 (0.91,1.52)       | 1.53 (1.19,1.97)       | 2.12 (1.64,2.73)       | 3.36 (2.54,4.43)        | <0.001               |
| <b>Mental health conditions</b>       |                        |                        |                        |                         |                      |
| Dementia                              | 0.93 (0.68,1.27)       | 1.01 (0.75,1.38)       | 1.38 (1.01,1.88)       | 1.46 (1.02,2.09)        | <0.001               |
| Anxiety                               | 1.00 (0.83,1.19)       | 1.22 (1.02,1.45)       | 1.52 (1.27,1.82)       | 2.25 (1.84,2.74)        | <0.001               |
| Depression                            | 1.06 (0.89,1.26)       | 1.33 (1.12,1.58)       | 1.68 (1.42,2.00)       | 2.42 (2.00,2.94)        | <0.001               |
| Schizophrenia                         | 1.03 (0.62,1.70)       | 1.28 (0.78,2.09)       | 1.97 (1.20,3.22)       | 3.55 (2.09,6.03)        | <0.001               |
| Substance abuse disorders             | 1.12 (0.84,1.48)       | 1.42 (1.08,1.86)       | 2.08 (1.58,2.74)       | 3.57 (2.64,4.82)        | <0.001               |

<sup>a</sup>Adjusted for sex, race, ethnicity, and individual level of education.

<sup>b</sup>The area deprivation index was estimated at the census block group level. Quintiles were defined using national area deprivation index rankings from the Neighborhood Atlas (<https://www.neighborhoodatlas.medicine.wisc.edu/>). Quintile 1 (1-20%) served as the reference (OR=1.00).

°Differences across quintiles were tested using a test for linear trend of the ORs. The P-value for trend was adjusted for the false discovery rate. The two-way interactions of area deprivation index by sex reached statistical significance for the following chronic conditions: hyperlipidemia, diabetes, cardiac arrhythmias, coronary artery disease, arthritis, osteoporosis, and depression.

**Supplemental Table 4. Odds ratio (95% confidence interval)<sup>a</sup> of each chronic condition across national quintiles of area deprivation index by race<sup>b</sup>**

| Chronic condition                     | Quintile 2<br>(21-40%) | Quintile 3<br>(41-60%) | Quintile 4<br>(61-80%) | Quintile 5<br>(81-100%) | P-trend <sup>c</sup> |
|---------------------------------------|------------------------|------------------------|------------------------|-------------------------|----------------------|
| <b>White (N=173,262)</b>              |                        |                        |                        |                         |                      |
| <b>Cardiometabolic conditions</b>     |                        |                        |                        |                         |                      |
| Hypertension                          | 1.34 (1.15,1.57)       | 1.64 (1.41,1.92)       | 1.89 (1.62,2.21)       | 2.58 (2.17,3.08)        | <0.001               |
| Hyperlipidemia                        | 1.14 (0.97,1.35)       | 1.36 (1.16,1.60)       | 1.43 (1.22,1.68)       | 1.92 (1.60,2.31)        | <0.001               |
| Diabetes                              | 1.12 (1.00,1.25)       | 1.23 (1.11,1.38)       | 1.37 (1.22,1.53)       | 1.73 (1.52,1.96)        | <0.001               |
| Cardiac arrhythmias                   | 1.06 (0.94,1.20)       | 1.15 (1.02,1.30)       | 1.32 (1.17,1.50)       | 1.54 (1.34,1.78)        | <0.001               |
| Coronary artery disease               | 1.12 (0.97,1.29)       | 1.32 (1.15,1.53)       | 1.50 (1.30,1.73)       | 1.86 (1.58,2.20)        | <0.001               |
| Congestive heart failure              | 1.35 (1.06,1.71)       | 1.55 (1.23,1.96)       | 1.94 (1.53,2.46)       | 2.47 (1.90,3.21)        | <0.001               |
| Stroke                                | 1.14 (0.96,1.37)       | 1.23 (1.03,1.47)       | 1.45 (1.22,1.74)       | 1.69 (1.38,2.08)        | <0.001               |
| <b>Other somatic conditions</b>       |                        |                        |                        |                         |                      |
| Arthritis                             | 0.97 (0.87,1.08)       | 1.03 (0.93,1.15)       | 1.07 (0.96,1.19)       | 1.11 (0.98,1.26)        | 0.0003               |
| Osteoporosis                          | 0.86 (0.70,1.06)       | 0.85 (0.70,1.05)       | 0.98 (0.80,1.21)       | 1.14 (0.90,1.45)        | 0.0057               |
| Cancer                                | 0.94 (0.83,1.05)       | 0.95 (0.85,1.07)       | 0.95 (0.84,1.06)       | 1.00 (0.87,1.15)        | 0.6772               |
| Chronic kidney disease                | 1.31 (1.09,1.57)       | 1.57 (1.32,1.88)       | 1.85 (1.54,2.21)       | 2.63 (2.17,3.21)        | <0.001               |
| Hepatitis                             | 0.96 (0.59,1.54)       | 1.34 (0.84,2.14)       | 1.92 (1.20,3.07)       | 3.43 (2.06,5.73)        | <0.001               |
| Asthma                                | 0.97 (0.86,1.09)       | 1.10 (0.98,1.24)       | 1.31 (1.16,1.48)       | 1.78 (1.55,2.04)        | <0.001               |
| Chronic obstructive pulmonary disease | 1.36 (1.08,1.72)       | 1.77 (1.41,2.22)       | 2.49 (1.98,3.13)       | 4.26 (3.32,5.46)        | <0.001               |
| <b>Mental health conditions</b>       |                        |                        |                        |                         |                      |
| Dementia                              | 0.95 (0.73,1.25)       | 0.97 (0.74,1.26)       | 1.24 (0.95,1.62)       | 1.30 (0.96,1.76)        | <0.001               |
| Anxiety                               | 1.11 (0.97,1.27)       | 1.32 (1.16,1.51)       | 1.68 (1.47,1.92)       | 2.40 (2.06,2.79)        | <0.001               |
| Depression                            | 1.21 (1.06,1.38)       | 1.49 (1.31,1.70)       | 1.88 (1.65,2.15)       | 2.59 (2.24,3.00)        | <0.001               |
| Schizophrenia                         | 0.94 (0.61,1.45)       | 1.17 (0.77,1.79)       | 2.01 (1.32,3.08)       | 3.13 (1.98,4.97)        | <0.001               |
| Substance abuse disorders             | 1.13 (0.88,1.46)       | 1.45 (1.13,1.86)       | 2.20 (1.71,2.83)       | 3.60 (2.73,4.75)        | <0.001               |
| <b>Non-white (N=24,316)</b>           |                        |                        |                        |                         |                      |
| <b>Cardiometabolic conditions</b>     |                        |                        |                        |                         |                      |
| Hypertension                          | 1.37 (1.06,1.77)       | 1.78 (1.38,2.29)       | 1.85 (1.44,2.39)       | 2.40 (1.80,2.39)        | <0.001               |
| Hyperlipidemia                        | 1.03 (0.82,1.30)       | 1.14 (0.90,1.43)       | 1.14 (0.91,1.44)       | 1.40 (1.07,1.82)        | 0.0058               |
| Diabetes                              | 1.11 (0.89,1.38)       | 1.25 (1.00,1.55)       | 1.42 (1.15,1.77)       | 1.62 (1.26,2.07)        | <0.001               |
| Cardiac arrhythmias                   | 0.94 (0.71,1.25)       | 1.00 (0.75,1.32)       | 1.17 (0.89,1.54)       | 1.63 (1.19,2.24)        | <0.001               |
| Coronary artery disease               | 1.45 (0.95,2.23)       | 1.36 (0.88,2.09)       | 1.64 (1.07,2.51)       | 2.32 (1.42,3.79)        | 0.0022               |
| Congestive heart failure              | 1.72 (0.80,3.72)       | 1.70 (0.79,3.67)       | 2.19 (1.03,4.69)       | 2.70 (1.18,6.17)        | 0.0087               |
| Stroke                                | 1.55 (0.76,3.17)       | 2.56 (1.28,5.11)       | 1.86 (0.92,3.76)       | 2.46 (1.11,5.44)        | 0.0634               |
| <b>Other somatic conditions</b>       |                        |                        |                        |                         |                      |
| Arthritis                             | 0.95 (0.73,1.23)       | 1.17 (0.90,1.51)       | 1.25 (0.97,1.62)       | 1.34 (0.99,1.81)        | <0.001               |
| Osteoporosis                          | 0.83 (0.51,1.36)       | 0.88 (0.54,1.43)       | 1.14 (0.70,1.86)       | 0.80 (0.43,1.48)        | 0.4146               |
| Cancer                                | 0.91 (0.69,1.21)       | 0.71 (0.53,0.96)       | 0.81 (0.60,1.08)       | 0.78 (0.53,1.15)        | 0.1150               |
| Chronic kidney disease                | 1.29 (0.84,1.99)       | 1.65 (1.08,2.52)       | 1.71 (1.12,2.61)       | 2.25 (1.40,3.62)        | 0.0014               |
| Hepatitis                             | 0.76 (0.46,1.26)       | 0.88 (0.54,1.45)       | 1.19 (0.73,1.92)       | 1.47 (0.83,2.58)        | 0.0031               |
| Asthma                                | 1.06 (0.75,1.49)       | 1.26 (0.90,1.77)       | 1.42 (1.02,1.98)       | 1.71 (1.18,2.48)        | 0.0010               |
| Chronic obstructive pulmonary disease | 1.83 (0.90,3.71)       | 2.60 (1.30,5.18)       | 3.44 (1.73,6.83)       | 5.26 (2.55,10.86)       | <0.001               |
| <b>Mental health conditions</b>       |                        |                        |                        |                         |                      |
| Dementia                              | 1.27 (0.57,2.84)       | 1.74 (0.79,3.82)       | 2.42 (1.11,5.25)       | 2.52 (1.06,5.97)        | 0.0009               |
| Anxiety                               | 1.56 (1.11,2.19)       | 1.68 (1.20,2.34)       | 1.78 (1.28,2.48)       | 2.72 (1.90,3.90)        | <0.001               |
| Depression                            | 1.47 (1.08,2.02)       | 1.79 (1.31,2.43)       | 1.89 (1.39,2.56)       | 2.36 (1.69,3.31)        | <0.001               |
| Schizophrenia                         | 1.41 (0.62,3.19)       | 1.62 (0.72,3.62)       | 2.26 (1.02,4.99)       | 3.36 (1.45,7.77)        | <0.001               |
| Substance abuse disorders             | 1.55 (0.88,2.75)       | 1.98 (1.14,3.46)       | 2.47 (1.42,4.30)       | 3.92 (2.18,7.05)        | <0.001               |

<sup>a</sup>Adjusted for sex, race, ethnicity, and individual level of education.

<sup>b</sup>The area deprivation index was estimated at the census block group level. Quintiles were defined using national area deprivation index rankings from the Neighborhood Atlas (<https://www.neighborhoodatlas.medicine.wisc.edu/>). Quintile 1 (1-20%) served as the reference (OR=1.00).

°Differences across quintiles were tested using a test for linear trend of the ORs. The P-value for trend was adjusted for the false discovery rate.

The two-way interactions of area deprivation index by race reached statistical significance for the following chronic conditions: hyperlipidemia, arthritis, hepatitis, anxiety, depression, and substance abuse disorders.

**Supplemental Table 5. Odds ratio (95% confidence interval)<sup>a</sup> of each chronic condition across national quintiles of area deprivation index by ethnicity<sup>b</sup>**

| Chronic condition                     | Quintile 2<br>(21-40%) | Quintile 3<br>(41-60%) | Quintile 4<br>(61-80%) | Quintile 5<br>(81-100%) | P-trend <sup>c</sup> |
|---------------------------------------|------------------------|------------------------|------------------------|-------------------------|----------------------|
| <b>Hispanic (N=10,546)</b>            |                        |                        |                        |                         |                      |
| <b>Cardiometabolic conditions</b>     |                        |                        |                        |                         |                      |
| Hypertension                          | 1.55 (1.05,2.29)       | 1.77 (1.20,2.60)       | 2.34 (1.59,3.46)       | 2.56 (1.68,3.89)        | <0.001               |
| Hyperlipidemia                        | 0.92 (0.66,1.28)       | 1.08 (0.78,1.50)       | 1.10 (0.79,1.54)       | 1.51 (1.06,2.17)        | 0.0011               |
| Diabetes                              | 1.12 (0.78,1.62)       | 1.34 (0.94,1.93)       | 1.76 (1.22,2.53)       | 2.33 (1.58,3.44)        | <0.001               |
| Cardiac arrhythmias                   | 1.08 (0.67,1.75)       | 1.36 (0.85,2.19)       | 1.58 (0.98,2.56)       | 1.96 (1.17,3.28)        | 0.0005               |
| Coronary artery disease               | 1.32 (0.70,2.48)       | 1.38 (0.74,2.58)       | 1.69 (0.90,3.19)       | 1.99 (1.00,3.96)        | 0.0186               |
| Congestive heart failure              | 7.04<br>(0.44,114.06)  | 12.03<br>(0.76,191.46) | 12.89<br>(0.80,206.51) | 20.18<br>(1.24,328.58)  | 0.0021               |
| Stroke                                | 0.59 (0.26,1.35)       | 0.91 (0.42,2.00)       | 0.98 (0.44,2.19)       | 0.98 (0.40,2.44)        | 0.2919               |
| <b>Other somatic conditions</b>       |                        |                        |                        |                         |                      |
| Arthritis                             | 0.91 (0.64,1.30)       | 1.17 (0.82,1.66)       | 1.12 (0.78,1.60)       | 1.50 (1.01,2.23)        | 0.0051               |
| Osteoporosis                          | 0.51 (0.25,1.04)       | 0.84 (0.43,1.66)       | 0.71 (0.35,1.45)       | 0.36 (0.15,0.89)        | 0.3622               |
| Cancer                                | 0.86 (0.58,1.28)       | 0.82 (0.55,1.23)       | 0.78 (0.52,1.19)       | 0.84 (0.51,1.37)        | 0.4063               |
| Chronic kidney disease                | 1.75 (0.80,3.81)       | 2.65 (1.23,5.70)       | 2.71 (1.25,5.87)       | 3.42 (1.51,7.74)        | 0.0011               |
| Hepatitis                             | 3.02<br>(0.39,23.63)   | 4.27 (0.56,32.78)      | 5.94 (0.78,45.22)      | 9.86 (1.27,76.78)       | 0.0005               |
| Asthma                                | 1.43 (0.87,2.35)       | 1.59 (0.97,2.61)       | 1.60 (0.97,2.63)       | 2.01 (1.19,3.39)        | 0.0143               |
| Chronic obstructive pulmonary disease | 1.48 (0.61,3.56)       | 1.83 (0.77,4.35)       | 2.55 (1.07,6.07)       | 3.65 (1.48,8.99)        | <0.001               |
| <b>Mental health conditions</b>       |                        |                        |                        |                         |                      |
| Dementia                              | 0.45 (0.20,1.03)       | 0.33 (0.14,0.78)       | 0.60 (0.27,1.37)       | 0.42 (0.16,1.12)        | 0.5998               |
| Anxiety                               | 1.09 (0.75,1.58)       | 1.25 (0.86,1.81)       | 1.45 (1.00,2.10)       | 1.86 (1.25,2.76)        | 0.0086               |
| Depression                            | 1.11 (0.80,1.56)       | 1.30 (0.94,1.81)       | 1.44 (1.04,2.01)       | 1.77 (1.24,2.53)        | 0.0019               |
| Schizophrenia                         | 1.11 (0.25,5.03)       | 1.38 (0.31,6.05)       | 2.40 (0.56,10.24)      | 3.42 (0.78,14.92)       | 0.0005               |
| Substance abuse disorders             | 1.30 (0.69,2.44)       | 1.55 (0.83,2.90)       | 2.01 (1.08,3.73)       | 2.99 (1.58,5.66)        | <0.001               |
| <b>Non-Hispanic (N=187,032)</b>       |                        |                        |                        |                         |                      |
| <b>Cardiometabolic conditions</b>     |                        |                        |                        |                         |                      |
| Hypertension                          | 1.34 (1.15,1.56)       | 1.65 (1.42,1.92)       | 1.88 (1.61,2.20)       | 2.58 (2.17,3.07)        | <0.001               |
| Hyperlipidemia                        | 1.14 (0.97,1.34)       | 1.35 (1.15,1.58)       | 1.42 (1.21,1.67)       | 1.87 (1.56,2.24)        | <0.001               |
| Diabetes                              | 1.12 (1.00,1.25)       | 1.23 (1.10,1.38)       | 1.36 (1.21,1.52)       | 1.65 (1.45,1.87)        | <0.001               |
| Cardiac arrhythmias                   | 1.05 (0.93,1.19)       | 1.14 (1.01,1.29)       | 1.31 (1.16,1.48)       | 1.54 (1.34,1.77)        | <0.001               |
| Coronary artery disease               | 1.13 (0.97,1.31)       | 1.33 (1.15,1.53)       | 1.50 (1.29,1.74)       | 1.88 (1.59,2.23)        | <0.001               |
| Congestive heart failure              | 1.30 (1.10,1.54)       | 1.50 (1.27,1.77)       | 1.88 (1.59,2.22)       | 2.43 (2.02,2.93)        | <0.001               |
| Stroke                                | 1.19 (0.99,1.44)       | 1.30 (1.08,1.56)       | 1.50 (1.25,1.80)       | 1.78 (1.44,2.20)        | <0.001               |
| <b>Other somatic conditions</b>       |                        |                        |                        |                         |                      |
| Arthritis                             | 0.97 (0.87,1.09)       | 1.04 (0.93,1.15)       | 1.09 (0.97,1.21)       | 1.11 (0.98,1.26)        | <0.001               |
| Osteoporosis                          | 0.87 (0.71,1.07)       | 0.86 (0.70,1.05)       | 1.00 (0.82,1.23)       | 1.16 (0.91,1.46)        | 0.0029               |
| Cancer                                | 0.94 (0.83,1.05)       | 0.95 (0.85,1.07)       | 0.95 (0.84,1.07)       | 1.00 (0.87,1.14)        | 0.6922               |
| Chronic kidney disease                | 1.29 (1.08,1.54)       | 1.55 (1.31,1.84)       | 1.81 (1.52,2.15)       | 2.59 (2.14,3.15)        | <0.001               |
| Hepatitis                             | 0.80 (0.55,1.16)       | 1.08 (0.76,1.55)       | 1.52 (1.06,2.17)       | 2.42 (1.62,3.62)        | <0.001               |
| Asthma                                | 0.96 (0.85,1.09)       | 1.11 (0.98,1.25)       | 1.31 (1.16,1.48)       | 1.78 (1.55,2.05)        | <0.001               |
| Chronic obstructive pulmonary disease | 1.38 (1.10,1.74)       | 1.81 (1.44,2.26)       | 2.53 (2.02,3.17)       | 4.33 (3.39,5.54)        | <0.001               |
| <b>Mental health conditions</b>       |                        |                        |                        |                         |                      |
| Dementia                              | 1.00 (0.76,1.31)       | 1.04 (0.80,1.35)       | 1.33 (1.02,1.74)       | 1.43 (1.05,1.94)        | <0.001               |
| Anxiety                               | 1.14 (0.99,1.31)       | 1.35 (1.18,1.55)       | 1.69 (1.48,1.94)       | 2.50 (2.14,2.91)        | <0.001               |
| Depression                            | 1.23 (1.08,1.41)       | 1.53 (1.34,1.74)       | 1.91 (1.67,2.17)       | 2.66 (2.30,3.08)        | <0.001               |
| Schizophrenia                         | 0.98 (0.65,1.49)       | 1.21 (0.81,1.82)       | 2.01 (1.34,3.02)       | 3.12 (2.00,4.87)        | <0.001               |
| Substance abuse disorders             | 1.16 (0.90,1.50)       | 1.48 (1.15,1.90)       | 2.21 (1.71,2.85)       | 3.66 (2.77,4.84)        | <0.001               |

<sup>a</sup>Adjusted for sex, race, ethnicity, and individual level of education.



<sup>b</sup>The area deprivation index was estimated at the census block group level. Quintiles were defined using national area deprivation index rankings from the Neighborhood Atlas (<https://www.neighborhoodatlas.medicine.wisc.edu/>). Quintile 1 (1-20%) served as the reference (OR=1.00).

<sup>c</sup>Differences across quintiles were tested using a test for linear trend of the ORs. The P-value for trend was adjusted for the false discovery rate.

The two-way interactions of area deprivation index by ethnicity reached statistical significance for the following chronic conditions: diabetes, asthma, anxiety, and depression.
